## **Correction: Dynamic Remodeling of Dendritic Arbors in GABAergic Interneurons of Adult Visual Cortex**

Wei-Chung Allen Lee, Hayden Huang, Guoping Feng, Joshua R. Sanes, Emery N. Brown, Peter T. So, Elly Nedivi

DOI: 10.1371/journal.pbio.0040029

In *PLoS Biology*, volume 4, issue 2:

The authors wish to add to the Acknowledgments that Emery N. Brown's work on the project was supported in part by a grant from the National Institute on Drug Abuse of the National Institutes of Health.

This correction note may be found online at DOI: 10.1371/journal.pbio.0040126.

Published May 16, 2006.

Citation: Correction: Dynamic remodeling of dendritic arbors in GABAergic interneurons of adult visual cortex. *PLoS Biol* 4(5): e126.
